# Supplementary material for: Fragmentation of Dicarboxylic and Tricarboxylic Acids in the Krebs Cycle Using GC-EI-MS and GC-EI-MS/MS
Source: PubMed Central journal article supplement (PMC6920549; doi:10.5702/massspectrometry.a0073), 2019-08-30

**Supplementary materials**

**Title**

Fragmentation of dicarboxylic and tricarboxylic acids in the Krebs cycle using GC-EI-MS and GC-EI-MS/MS.

**Authors**

Nobuyuki Okahashi<sup>1</sup>, Shuichi Kawana<sup>2</sup>, Junko Iida<sup>2,3</sup>, Hiroshi Shimizu<sup>1</sup>, and Fumio Matsuda<sup>1</sup>

<sup>1</sup>Department of Bioinformatic Engineering, Graduate School of Information Science and Technology, Osaka University, 1-5 Yamadaoka, Suita, Osaka, Japan

<sup>2</sup>Analytical and Measuring Instruments Division, Shimadzu Corporation, 1 Nishinokyo Kuwabara-cho, Nakagyo-ku, Kyoto, Japan

<sup>3</sup>Osaka University Shimadzu Analytical Innovation Research Laboratory, Graduate School of Engineering, Osaka University, 2-1 Yamadaoka, Suita, Osaka, Japan

This document includes following contents.

Supplementary figure 1 Carbon transition of enzyme reactions *in vitro*

Supplementary materials 1 MS spectra of EI-fragments of TMS derivatives

Supplementary materials 2 MS spectra of EI-fragments of TBDMS derivatives

Supplementary materials 3 MS/MS spectra of CID-fragments of TMS derivatives

Supplementary materials 4 MS/MS spectra of CID-fragments of TBDMS derivatives

Supplementary figure 1

Carbon transition of enzyme reactions *in vitro* of (a) malic and (b) citric acid.

(a)

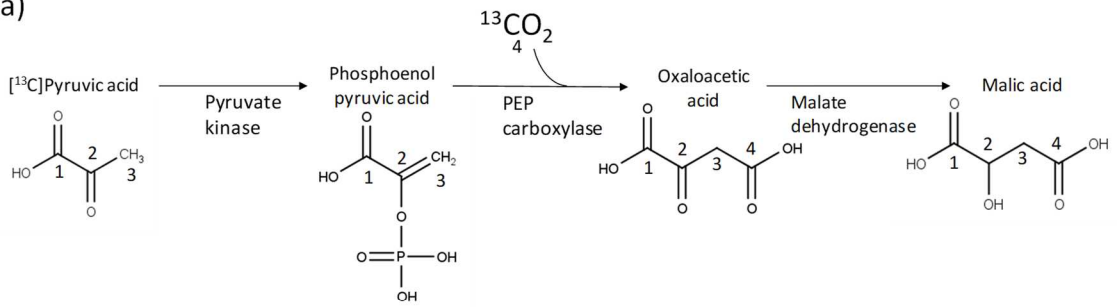

(b)

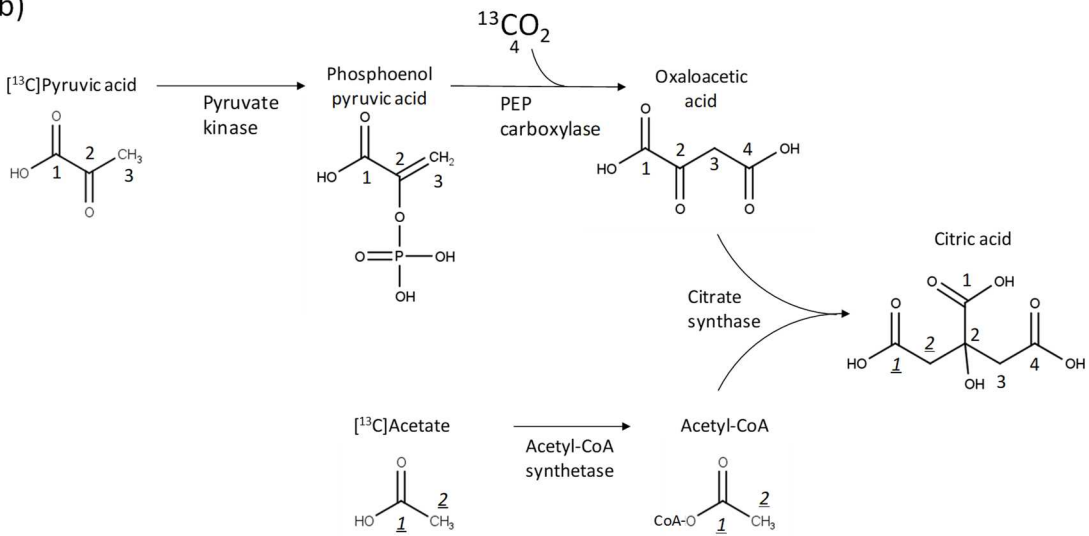

Natural citric acid (4TMS)

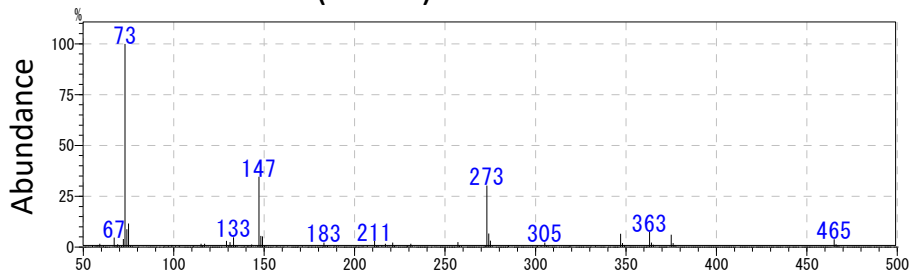

[1-<sup>13</sup>C]citric acid (4TMS)

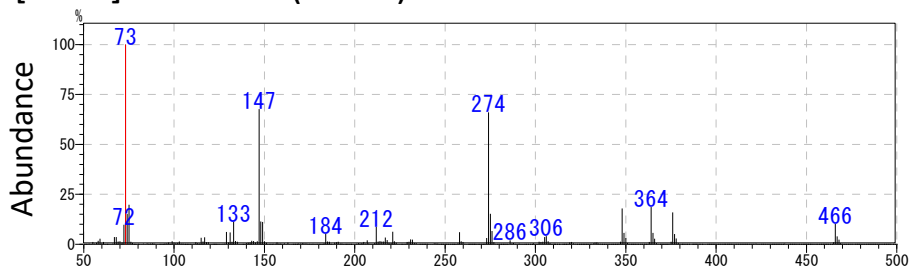

[5-<sup>13</sup>C]citric acid (4TMS)

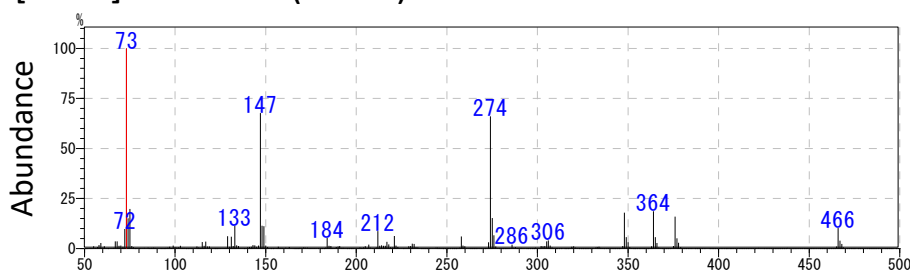

[6-<sup>13</sup>C]citric acid (4TMS)

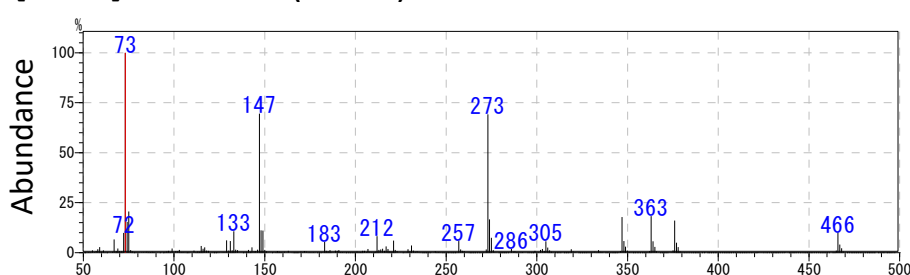

[U-<sup>13</sup>C]citric acid (4TMS)

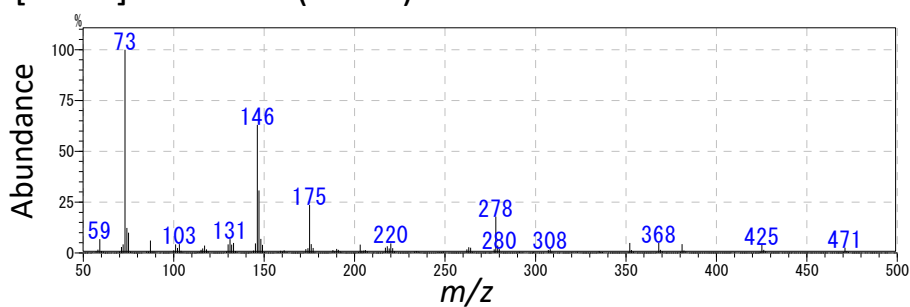

### Natural $\alpha$ -ketoglutaric acid (1MEOX and 2TMS)

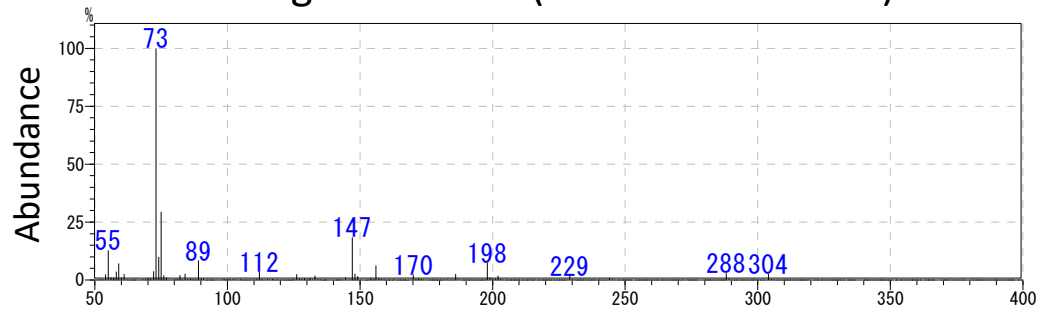

### [1,2,3,4- $^{13}\text{C}$ ] $\alpha$ -ketoglutaric acid (1MEOX and 2TMS)

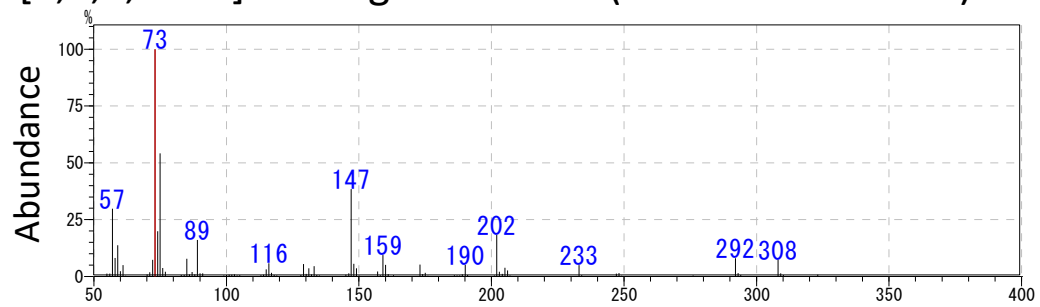

### [U- $^{13}\text{C}$ ] $\alpha$ -ketoglutaric acid (1MEOX and 2TMS)

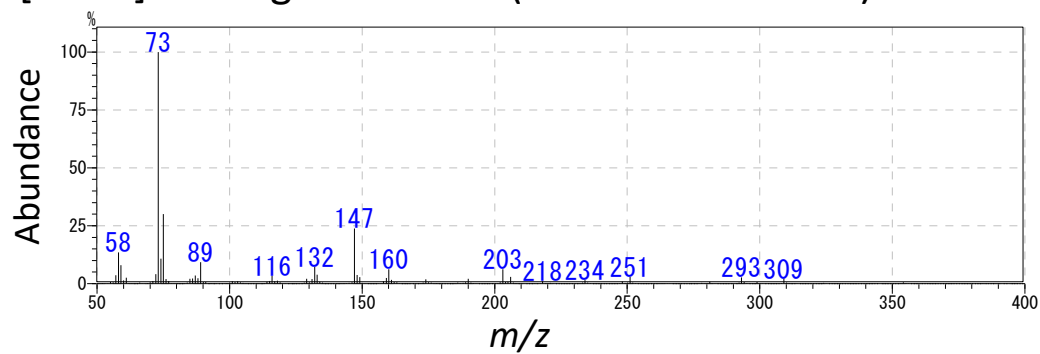

### Natural succinic acid (2TMS)

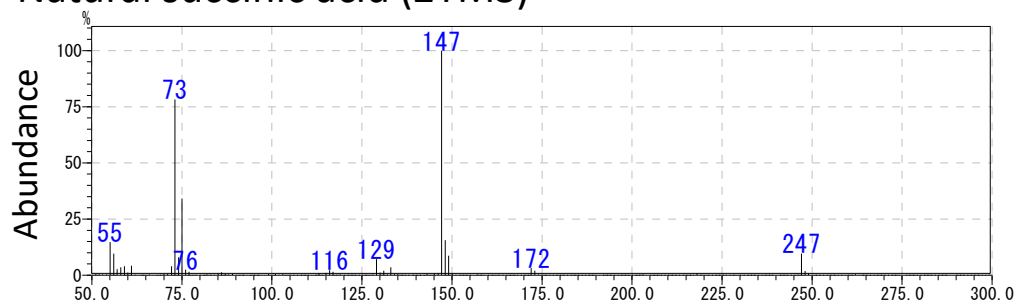

### [U-<sup>13</sup>C]succinic acid (2TMS)

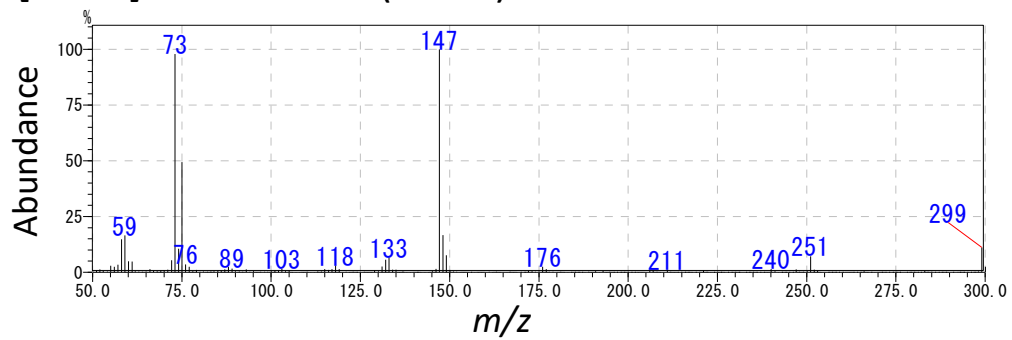

### Natural fumaric acid (2TMS)

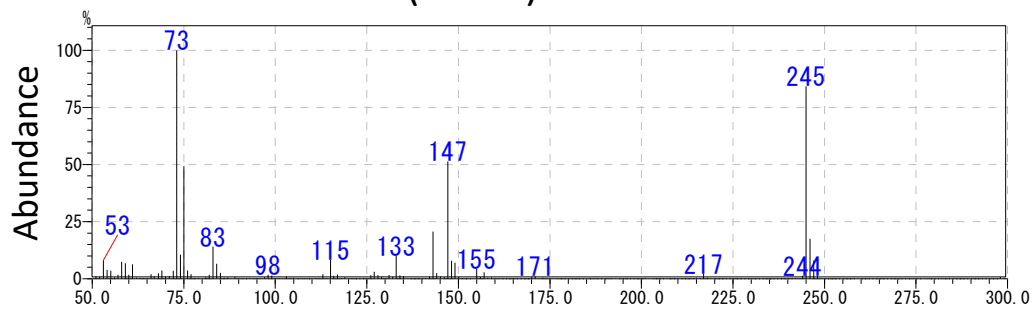

### [U-<sup>13</sup>C]fumaric acid (2TMS)

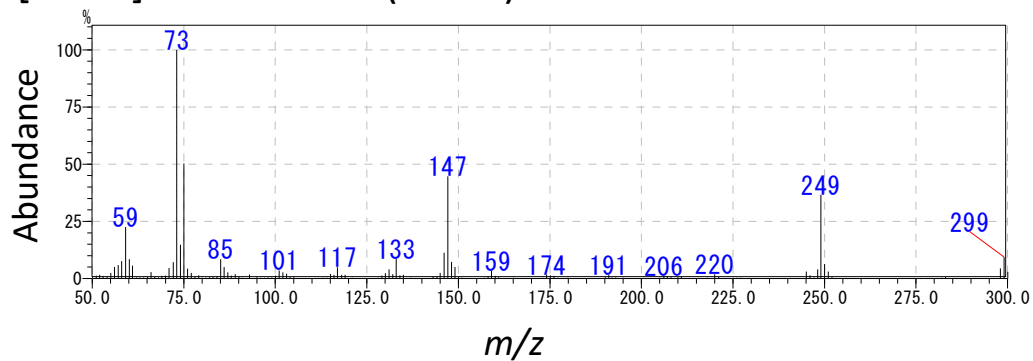

Natural malic acid (3TMS)

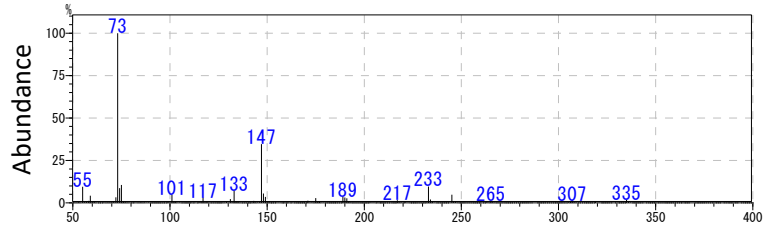

[1-<sup>13</sup>C]malic acid (3TMS)

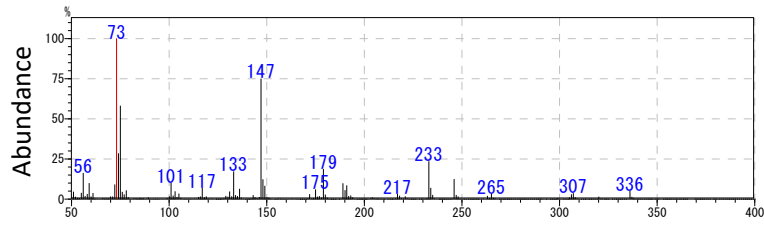

[2-<sup>13</sup>C]malic acid (3TMS)

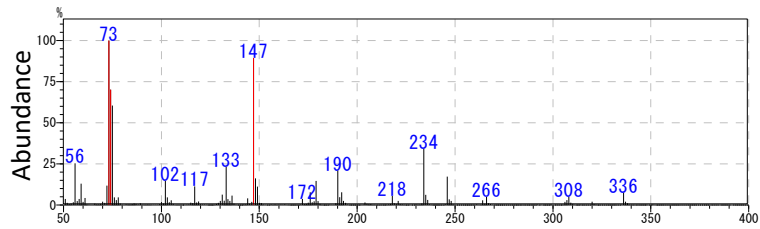

[3-<sup>13</sup>C]malic acid (3TMS)

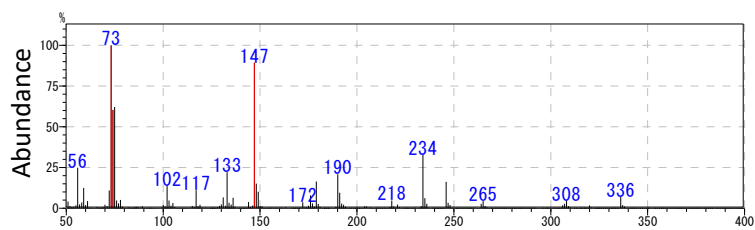

[4-<sup>13</sup>C]malic acid (3TMS)

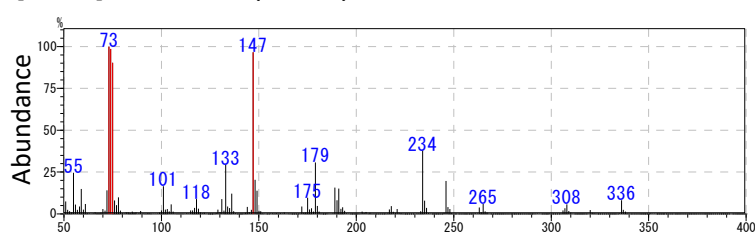

[U-<sup>13</sup>C]malic acid (3TMS)

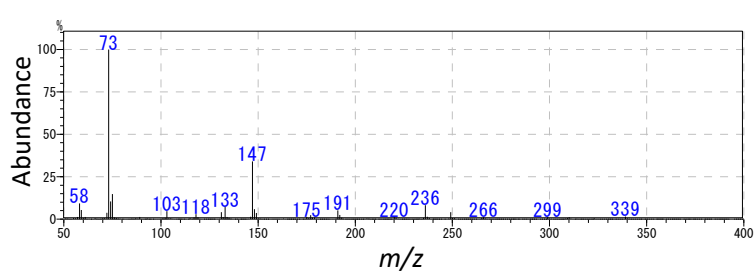

Supplementary materials 2 MS spectra of EI-fragments of TBDMS derivatives

Natural citrate (4TBDMS)

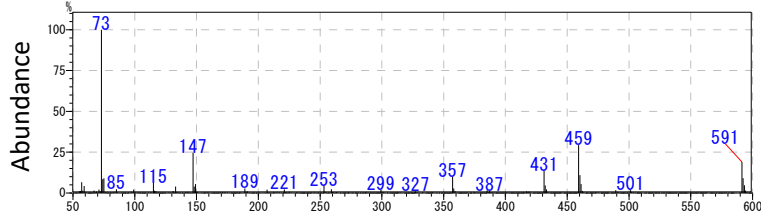

[1-<sup>13</sup>C]citric acid (4TBDMS)

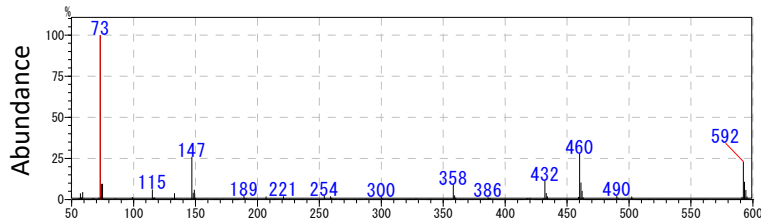

[5-<sup>13</sup>C]citric acid (4TBDMS)

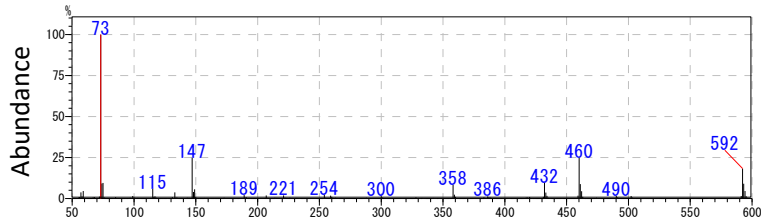

[6-<sup>13</sup>C]citric acid (4TBDMS)

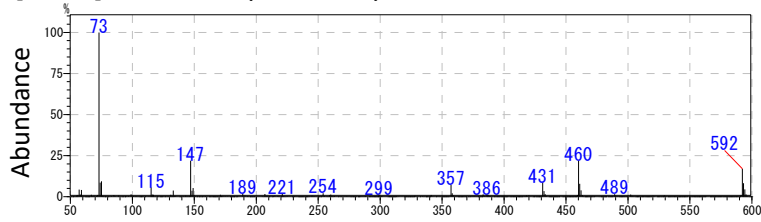

[1,5-<sup>13</sup>C]citric acid (4TBDMS)

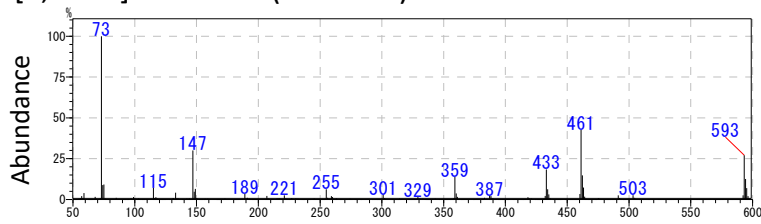

[U-<sup>13</sup>C]citric acid (4TBDMS)

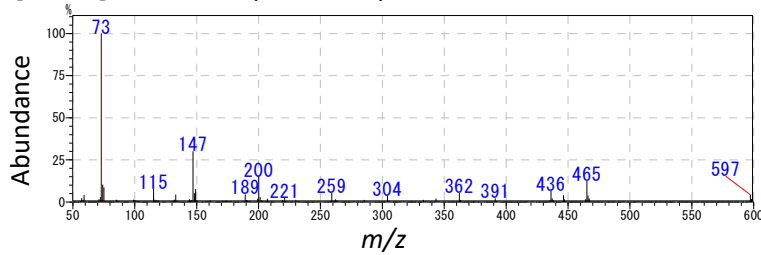



### Natural $\alpha$ -ketoglutaric acid (1MEOX and 2TBDMS)

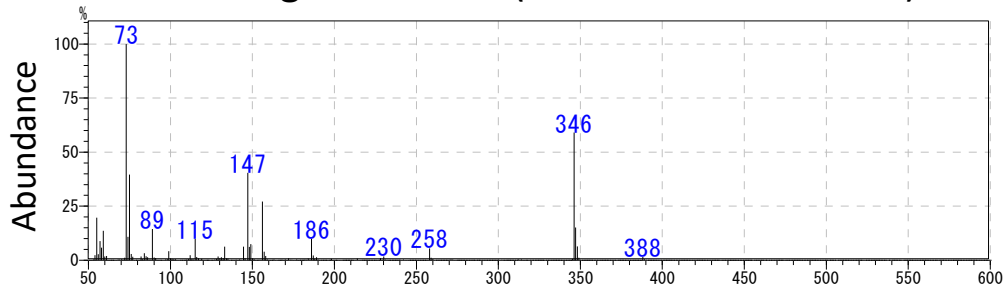

### [1,2,3,4- $^{13}\text{C}$ ] $\alpha$ -ketoglutaric acid (1MEOX and 2TBDMS)

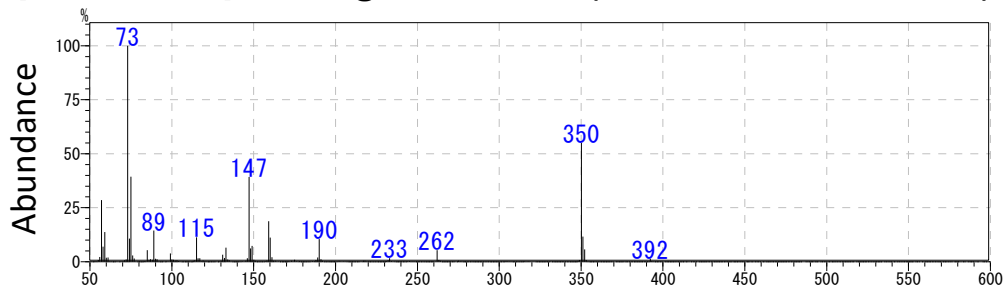

### [U- $^{13}\text{C}$ ] $\alpha$ -ketoglutaric acid (1MEOX and 2TBDMS)

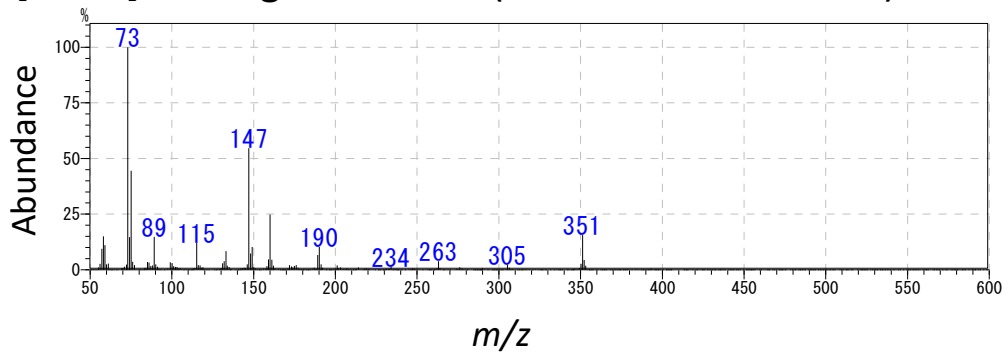

m/z

### Natural succinic acid (2TBDMS)

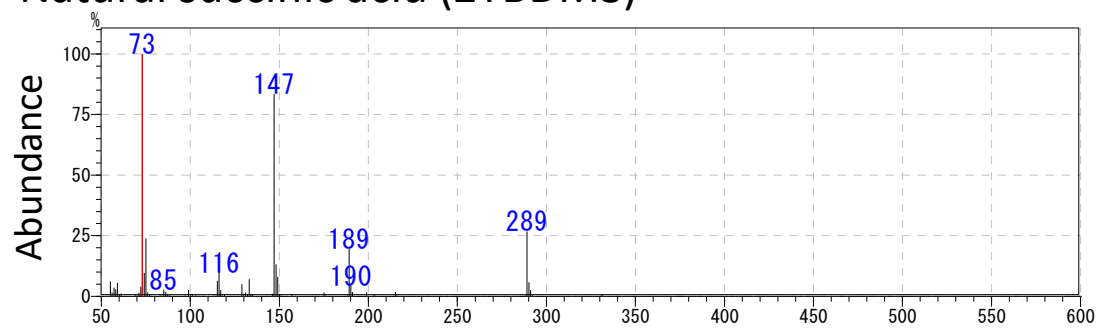

### [U-<sup>13</sup>C]succinic acid (2TBDMS)

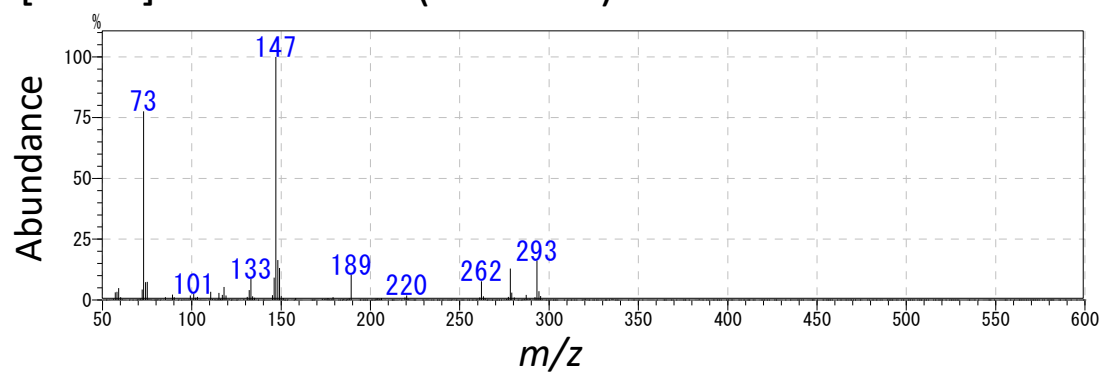

### Natural fumaric acid (2TBDMS)

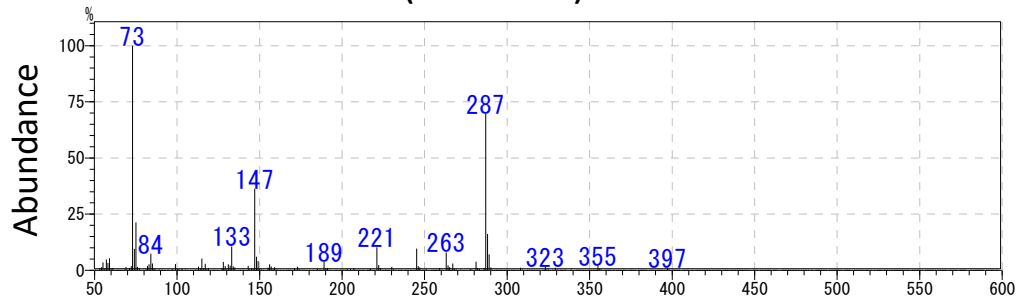

### [U-<sup>13</sup>C]fumaric acid (2TBDMS)

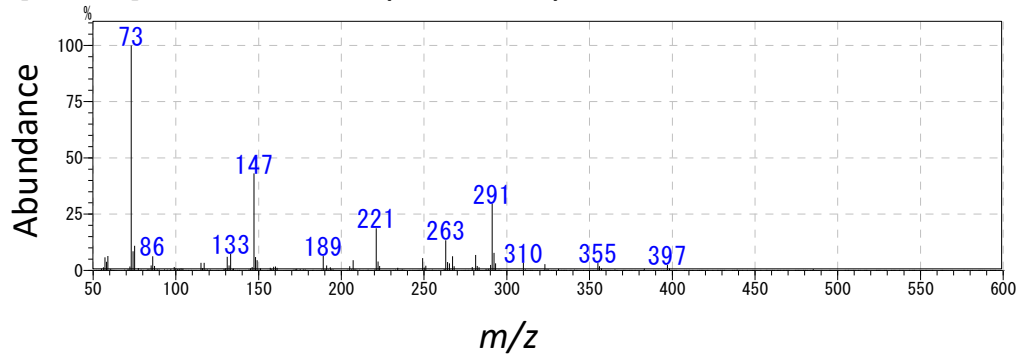

### Natural malic acid (3TBDMS)

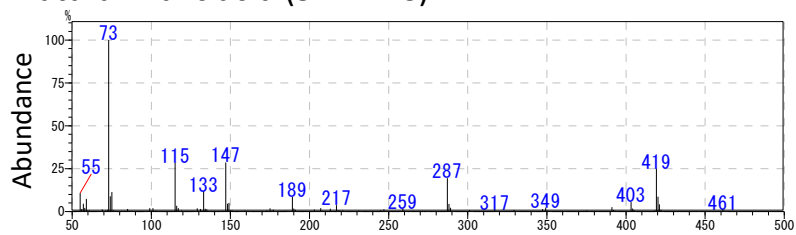

### [1-<sup>13</sup>C]malic acid (3TBDMS)

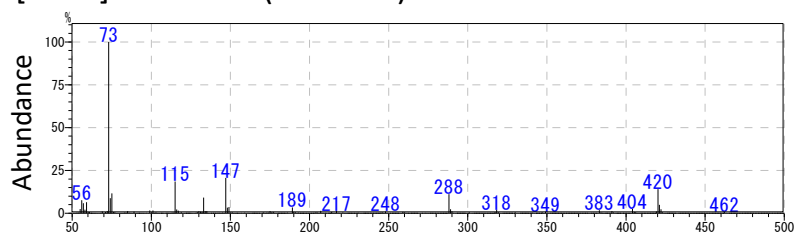

### [2-<sup>13</sup>C]malic acid (3TBDMS)

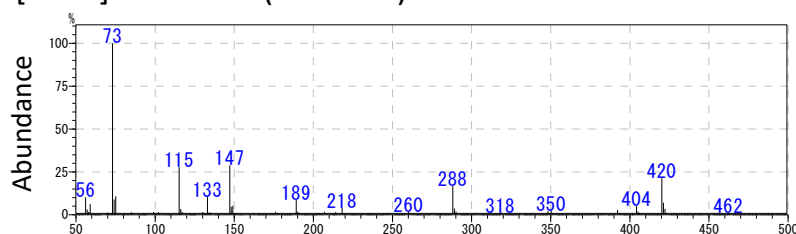

### [3-<sup>13</sup>C]malic acid (3TBDMS)

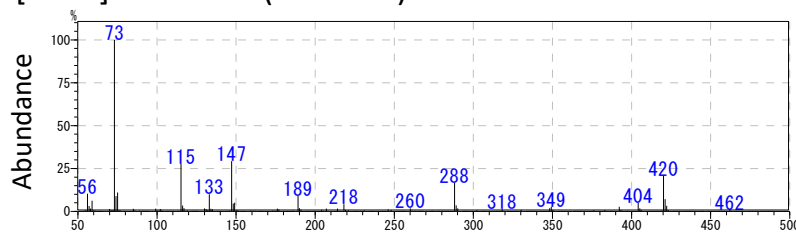

### [4-<sup>13</sup>C]malic acid (3TBDMS)

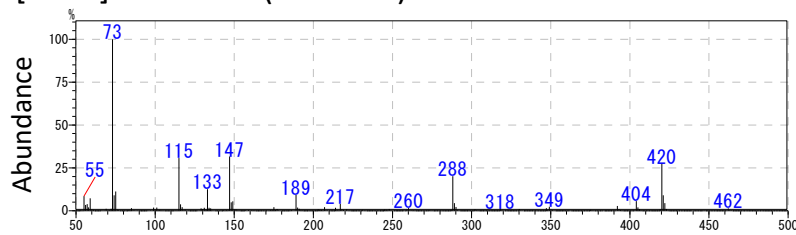

### [U-<sup>13</sup>C]malic acid (3TBDMS)

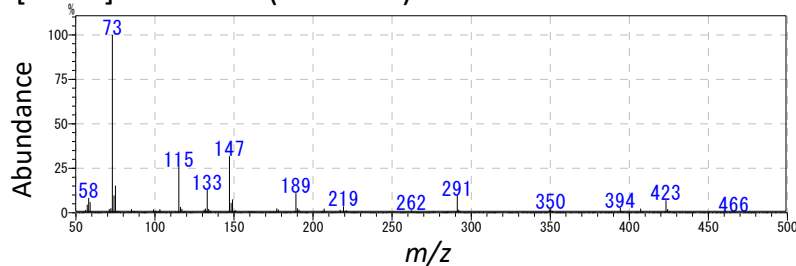

Natural Citric acid (4TMS), precursor ion:  $m/z = 465$

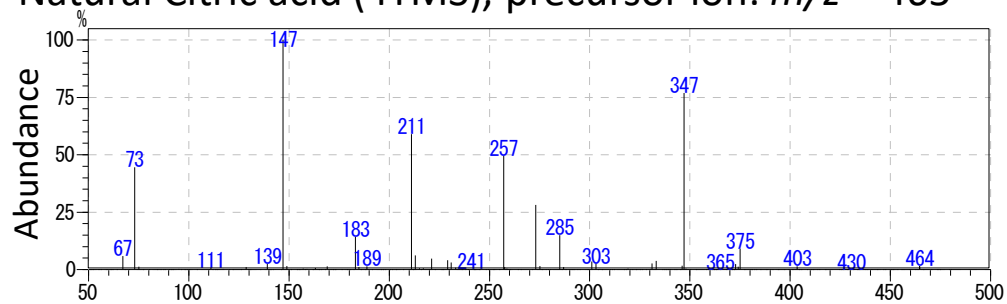

[U- $^{13}C$ ]citric acid (4TMS), precursor ion:  $m/z = 471$

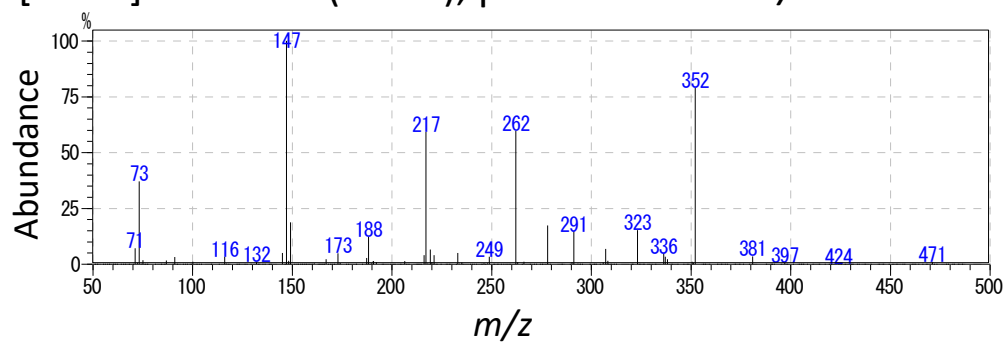

Natural Citric acid (4TMS), precursor ion:  $m/z = 363$

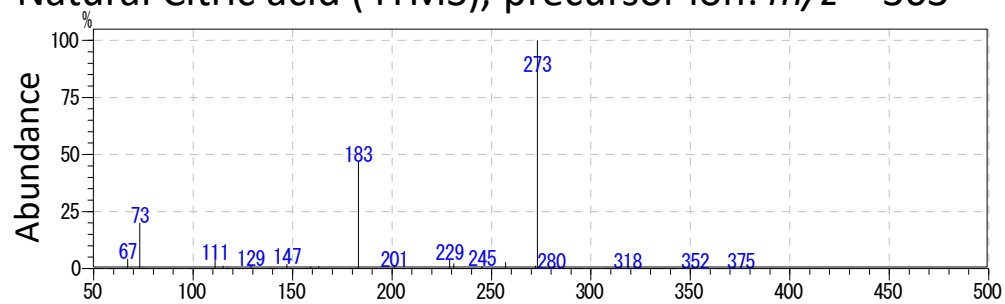

[U- $^{13}\text{C}$ ]citric acid (4TMS), precursor ion:  $m/z = 368$

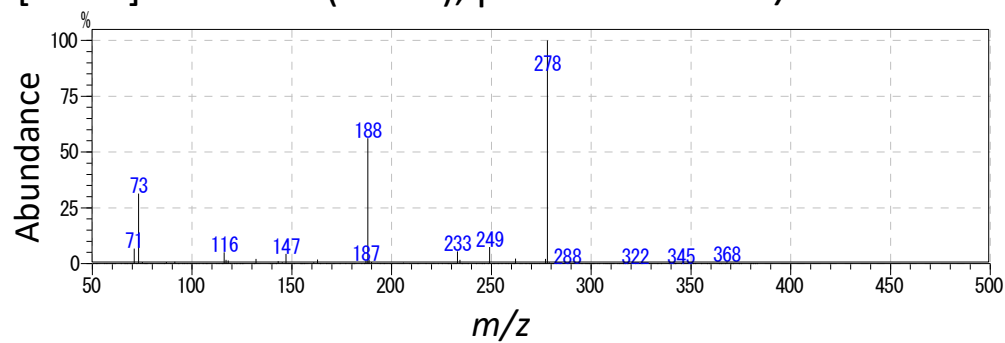

Natural Citric acid (4TMS), precursor ion:  $m/z = 273$

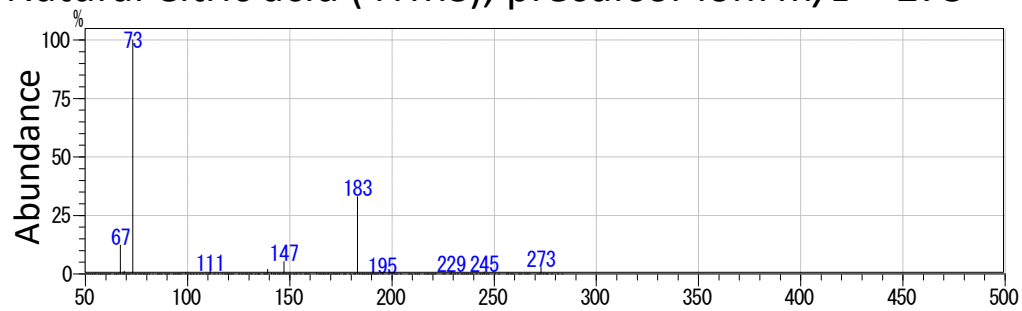

[U- $^{13}\text{C}$ ]citric acid (4TMS), precursor ion:  $m/z = 278$

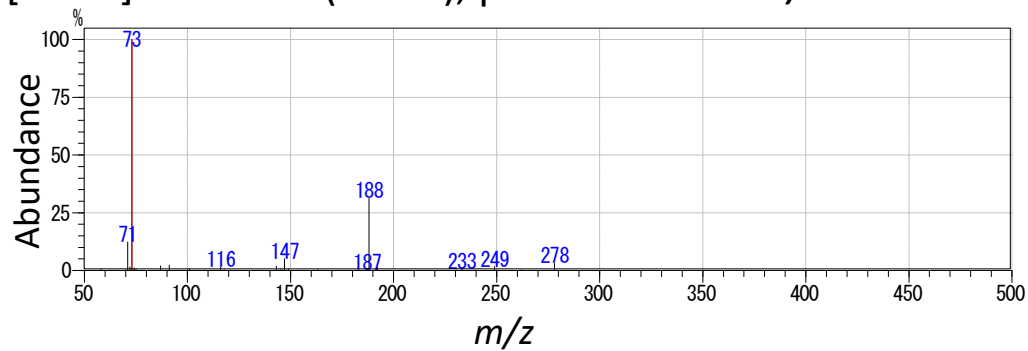

Natural  $\alpha$ -ketoglutaric acid (1MEOX and 2TMS),  
precursor ion:  $m/z = 288$

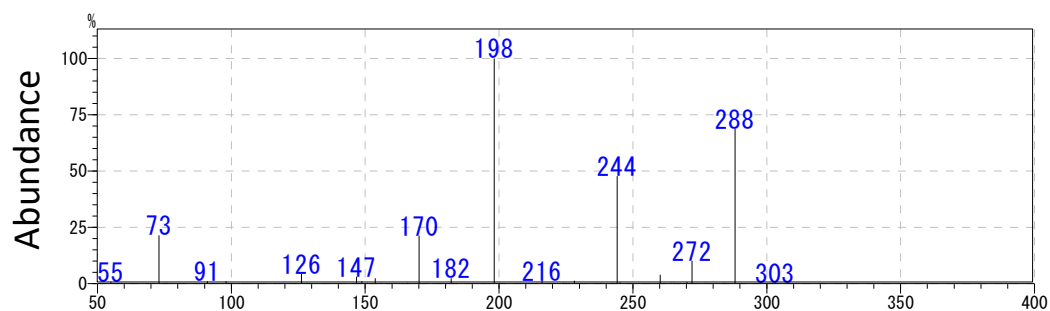

[1,2,3,4- $^{13}\text{C}$ ] $\alpha$ -ketoglutaric acid (1MEOX and 2TMS),  
precursor ion:  $m/z = 292$

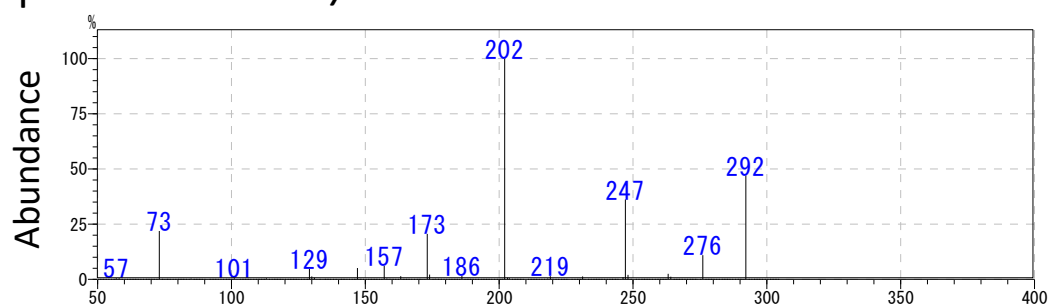

[U- $^{13}\text{C}$ ] $\alpha$ -ketoglutaric acid (1MEOX and 2TMS),  
precursor ion:  $m/z = 293$

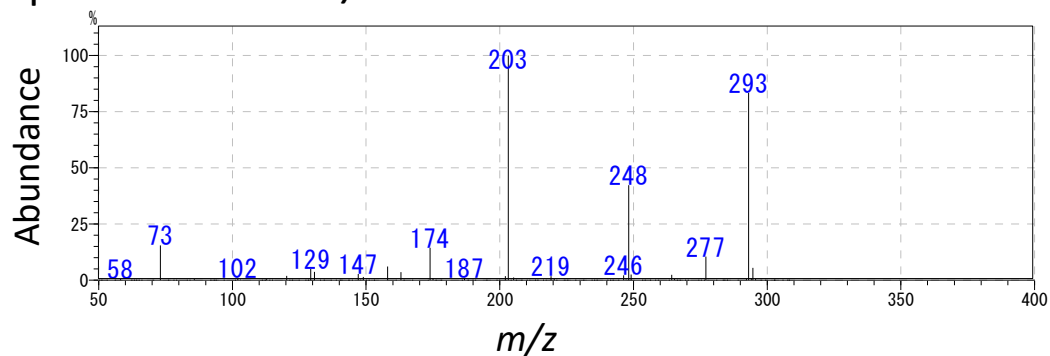



Natural succinic acid (2TMS), precursor ion:  $m/z = 247$

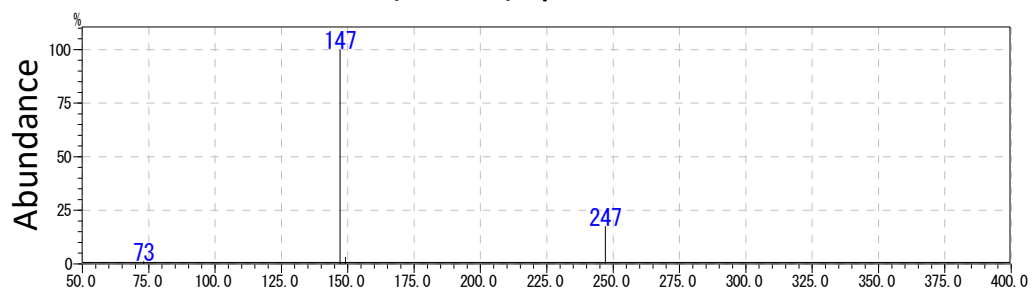

[U- $^{13}\text{C}$ ]succinic acid (4TMS), precursor ion:  $m/z = 251$

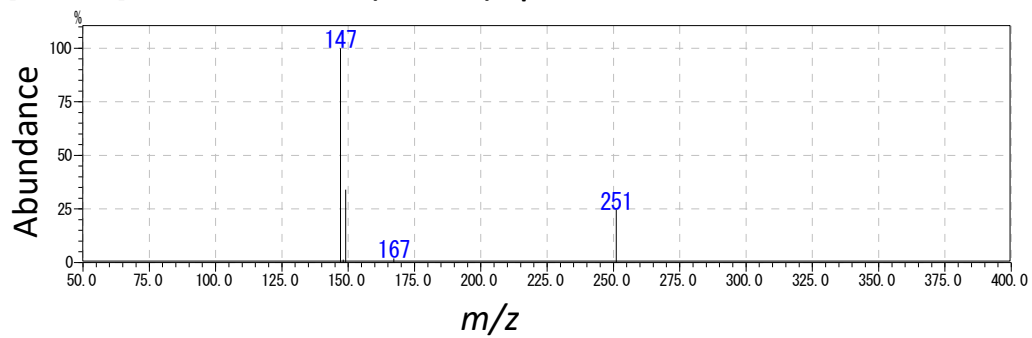

Natural fumaric acid (2TMS), precursor ion:  $m/z = 245$

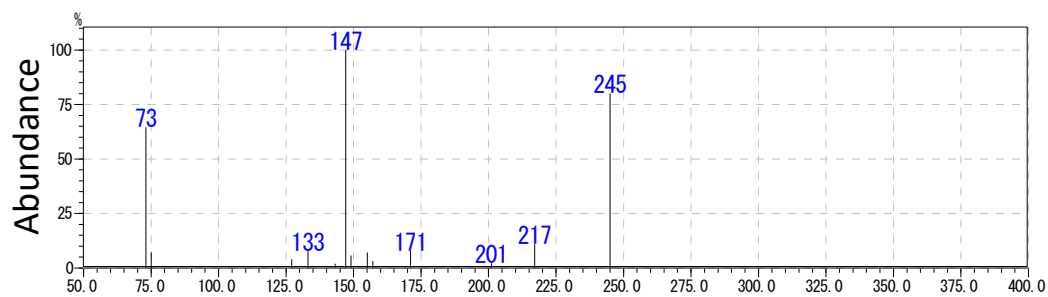

[U- $^{13}\text{C}$ ]fumaric acid (4TMS), precursor ion:  $m/z = 249$

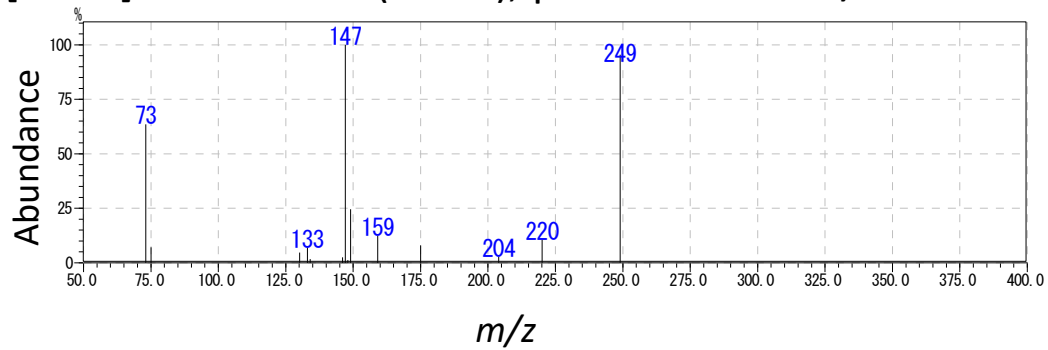

Natural malic acid (3TMS), precursor ion:  $m/z = 335$

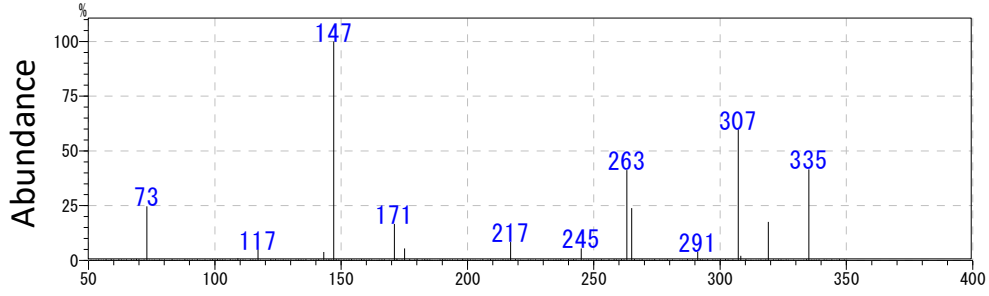

[2- $^{13}\text{C}$ ]malic acid (3TMS), precursor ion:  $m/z = 336$

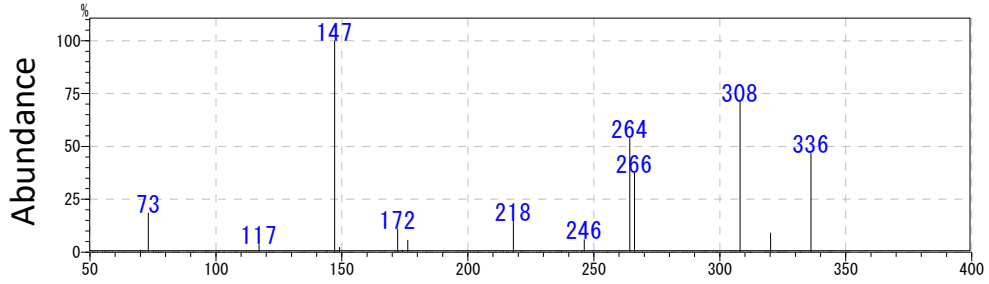

[3- $^{13}\text{C}$ ]malic acid (3TMS), precursor ion:  $m/z = 336$

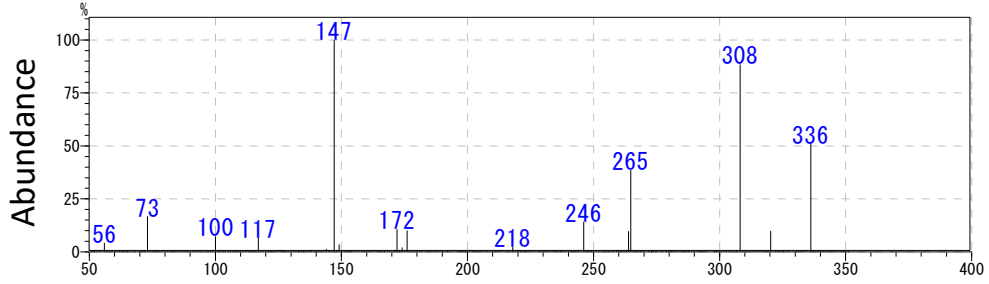

[4- $^{13}\text{C}$ ]malic acid (3TMS), precursor ion:  $m/z = 336$

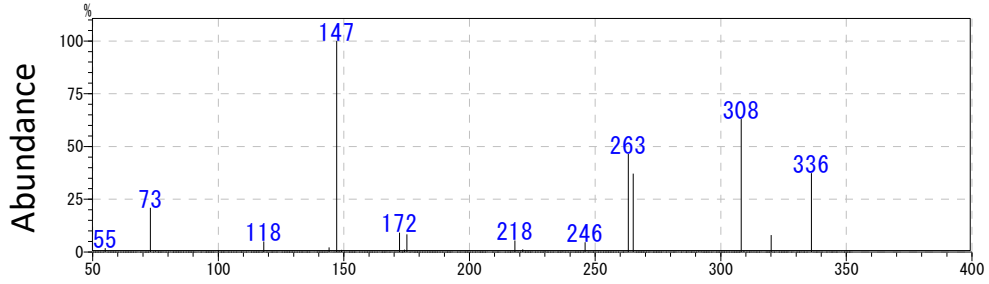

[U- $^{13}\text{C}$ ]malic acid (3TMS), precursor ion:  $m/z = 339$

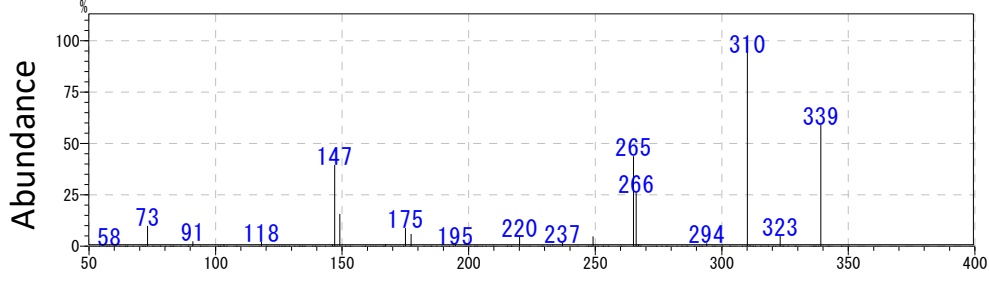

$m/z$

Natural malic acid (3TMS), precursor ion:  $m/z = 233$

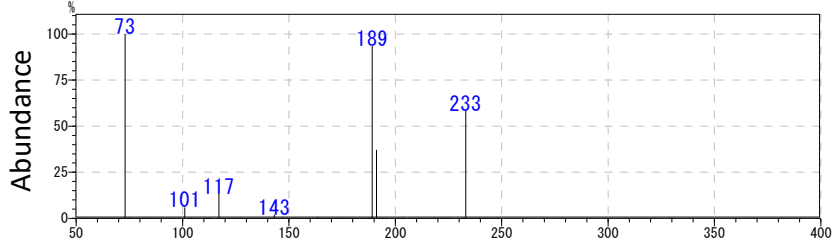

[1- $^{13}\text{C}$ ]malic acid (3TMS), precursor ion:  $m/z = 233$

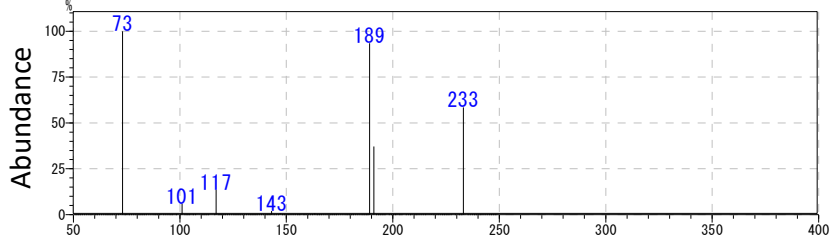

[2- $^{13}\text{C}$ ]malic acid (3TMS), precursor ion:  $m/z = 234$

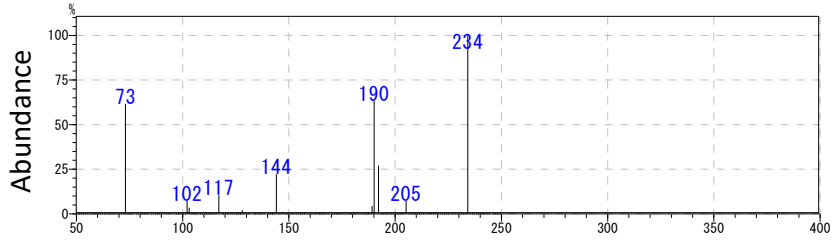

[3- $^{13}\text{C}$ ]malic acid (3TMS), precursor ion:  $m/z = 234$

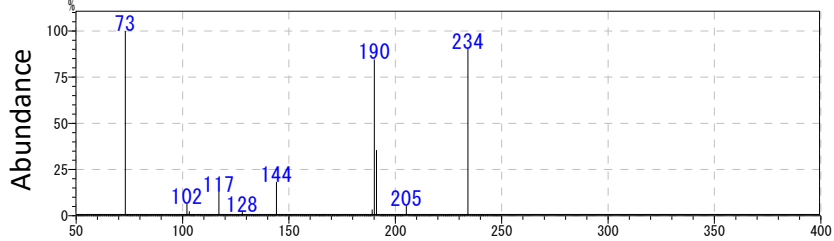

[4- $^{13}\text{C}$ ]malic acid (3TMS), precursor ion:  $m/z = 234$

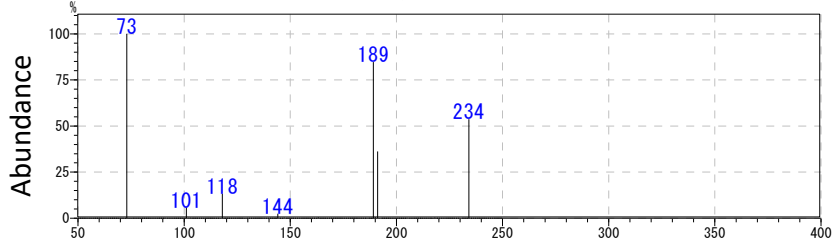

[U- $^{13}\text{C}$ ]malic acid (3TMS), precursor ion:  $m/z = 236$

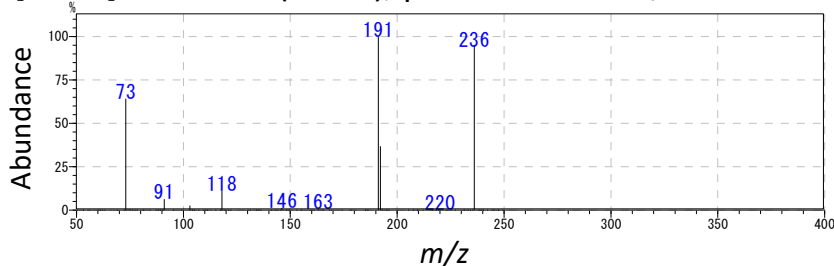

Supplementary materials 4 MS/MS spectra of CID-fragments of TBDMS derivatives

Natural citric acid (4TBDMS), precursor ion:  $m/z = 459$

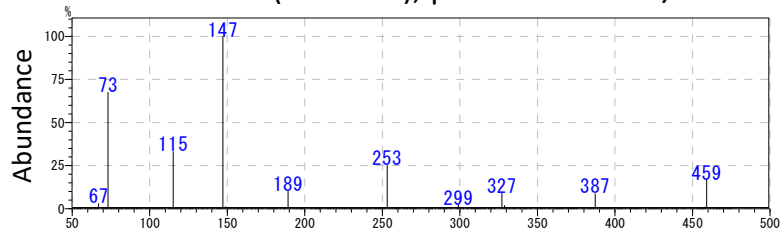

[1-<sup>13</sup>C]citric acid (4TBDMS), precursor ion:  $m/z = 460$

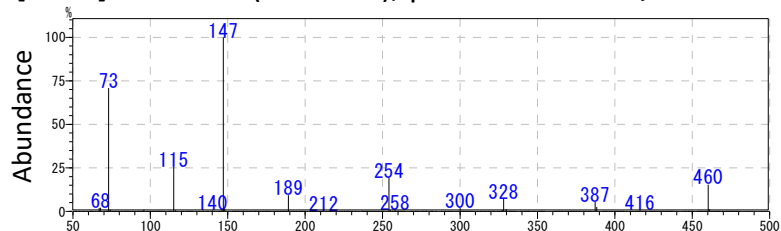

[5-<sup>13</sup>C]citric acid (4TBDMS), precursor ion:  $m/z = 460$

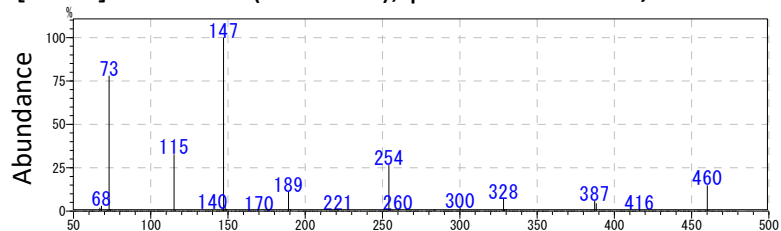

[6-<sup>13</sup>C]citric acid (4TBDMS), precursor ion:  $m/z = 460$

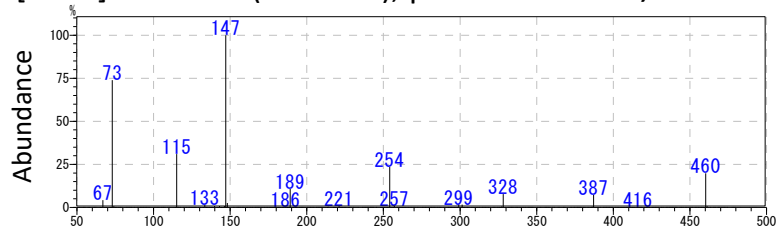

[1,5-<sup>13</sup>C]citric acid (4TBDMS), precursor ion:  $m/z = 461$

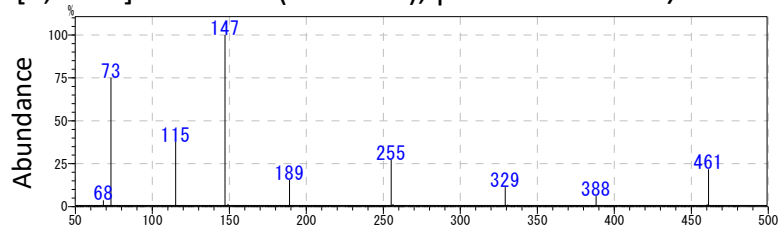

[U-<sup>13</sup>C]citric acid (4TBDMS), precursor ion:  $m/z = 465$

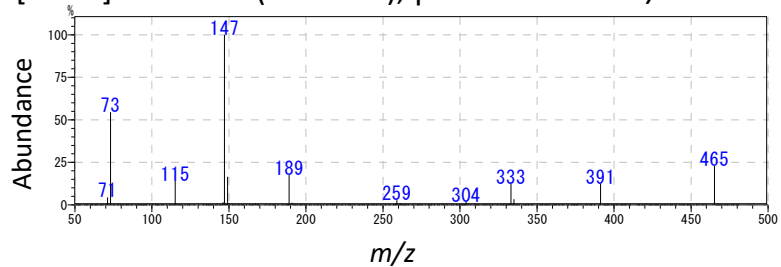

$m/z$

Natural citric acid (4TBDMS), precursor ion:  $m/z = 357$

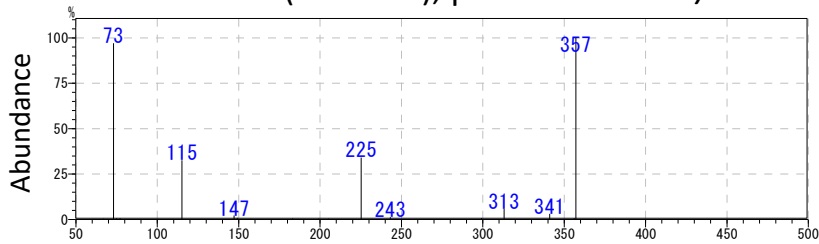

[1-<sup>13</sup>C]citric acid (4TBDMS), precursor ion:  $m/z = 358$

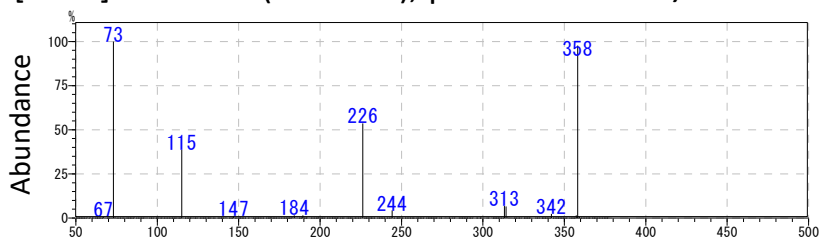

[5-<sup>13</sup>C]citric acid (4TBDMS), precursor ion:  $m/z = 358$

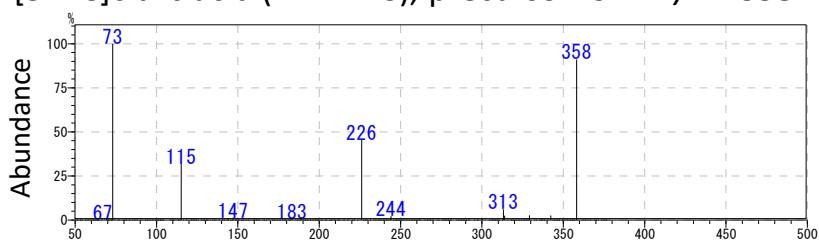

[6-<sup>13</sup>C]citric acid (4TBDMS), precursor ion:  $m/z = 357$

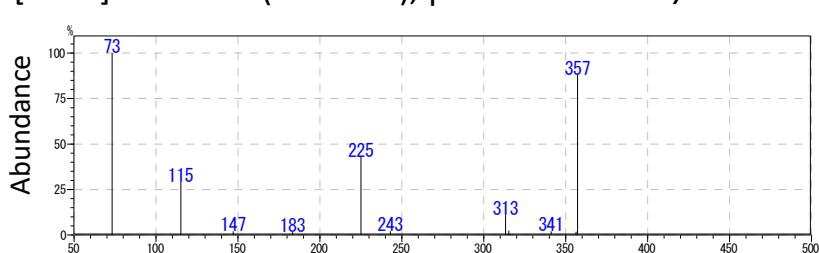

[1,5-<sup>13</sup>C]citric acid (4TBDMS), precursor ion:  $m/z = 359$

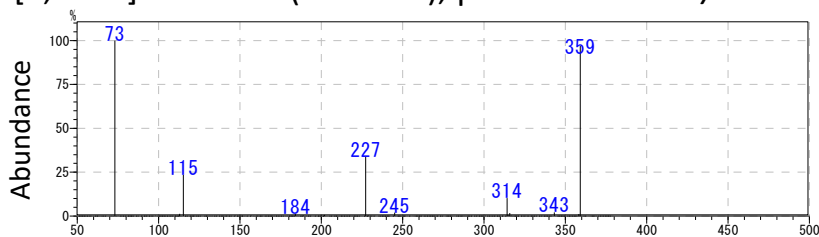

[U-<sup>13</sup>C]citric acid (4TBDMS), precursor ion:  $m/z = 362$

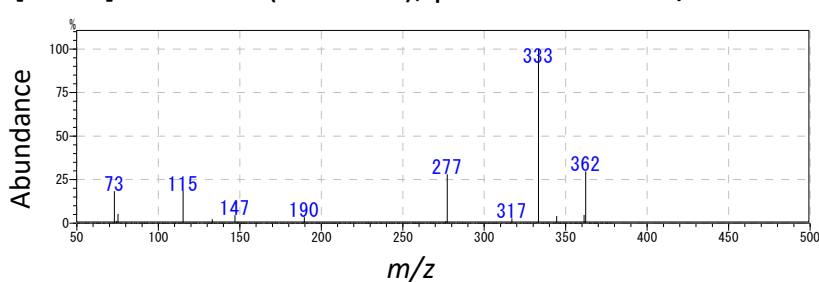

Natural  $\alpha$ -ketoglutaric acid (1MEOX and +2TBDMS),  
precursor ion:  $m/z = 346$

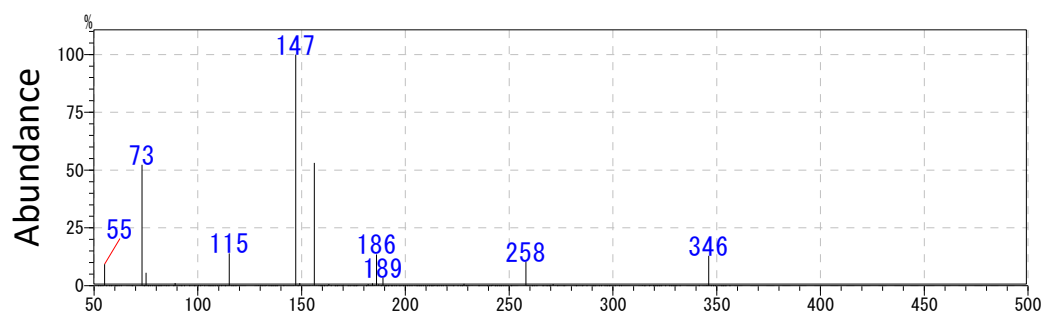

[1,2,3,4- $^{13}\text{C}$ ] $\alpha$ -ketoglutaric acid (1MEOX and 2TBDMS),  
precursor ion:  $m/z = 350$

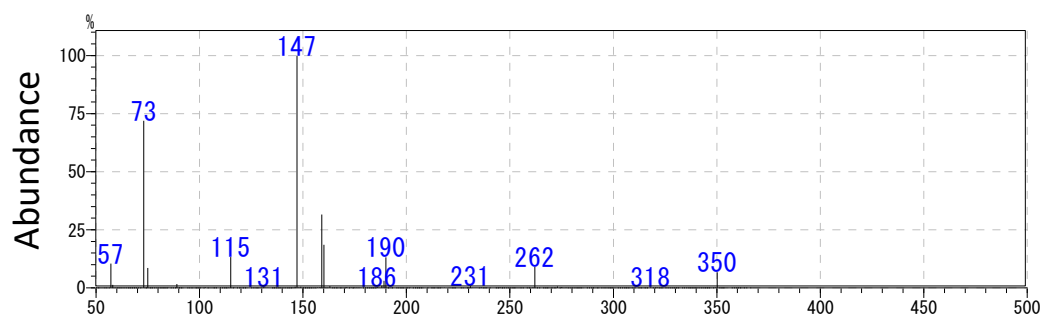

[U- $^{13}\text{C}$ ] $\alpha$ -ketoglutaric acid (1MEOX and 2TBDMS),  
precursor ion:  $m/z = 351$

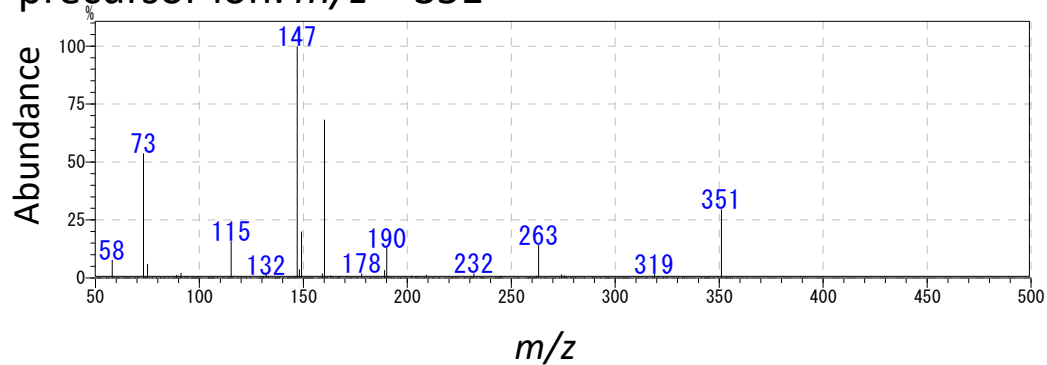

Natural  $\alpha$ -ketoglutaric acid (1MEOX and 2TBDMS),  
precursor ion:  $m/z = 156$

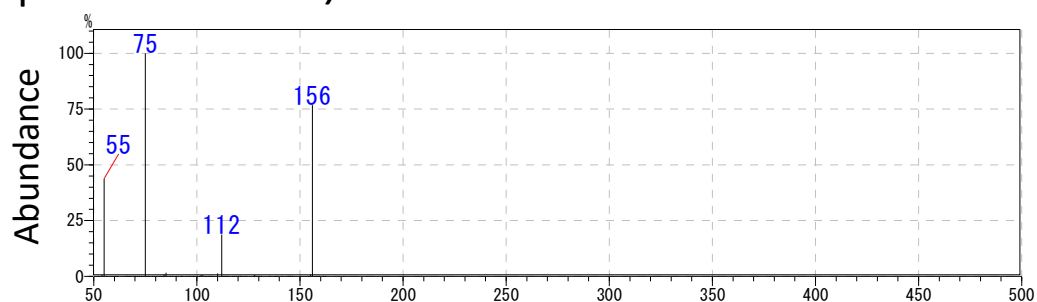

[1,2,3,4- $^{13}\text{C}$ ] $\alpha$ -ketoglutaric acid (1MEOX and 2TBDMS),  
precursor ion:  $m/z = 160$

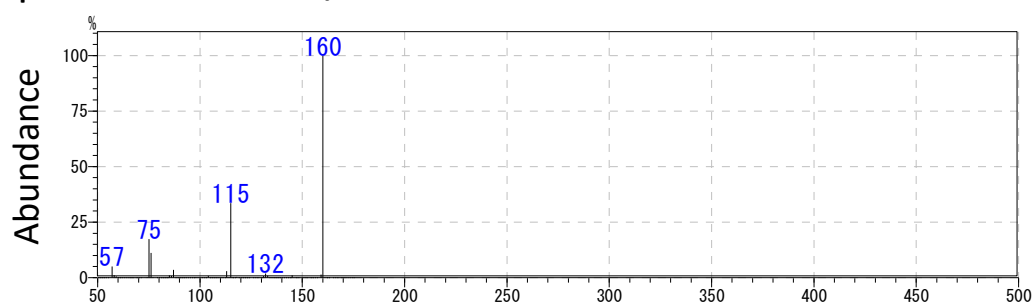

[U- $^{13}\text{C}$ ] $\alpha$ -ketoglutaric acid (1MEOX and 2TBDMS),  
precursor ion:  $m/z = 160$

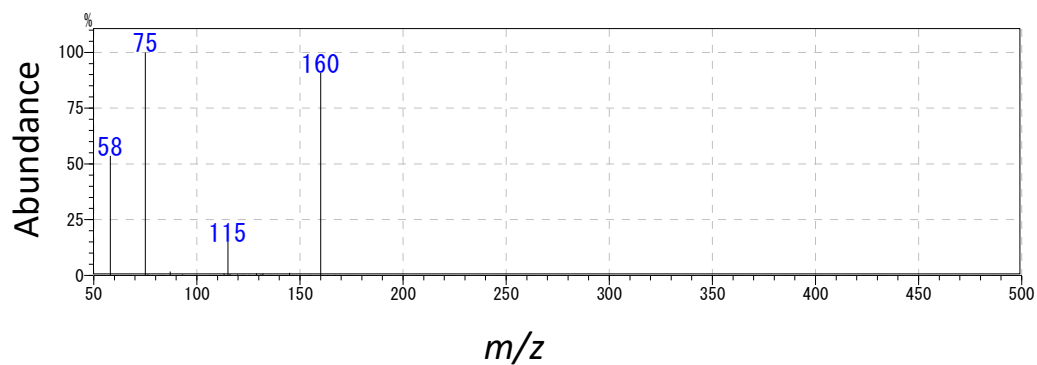



Natural succinic acid (2TBDMS), precursor ion:  $m/z = 289$

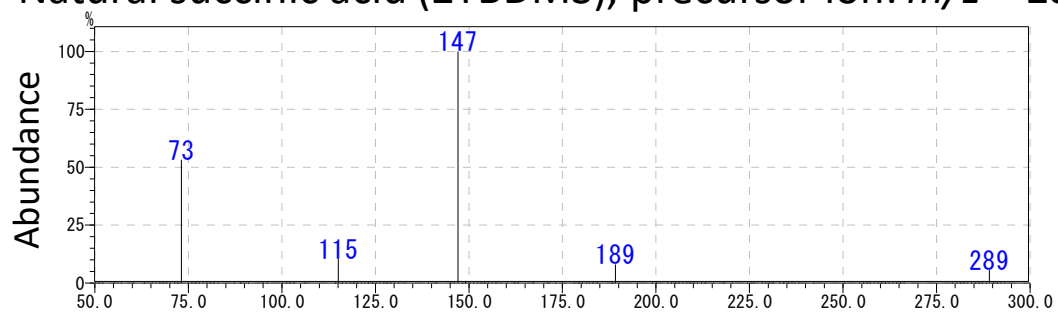

[U- $^{13}\text{C}$ ]succinic acid (2TBDMS), precursor ion:  $m/z = 293$

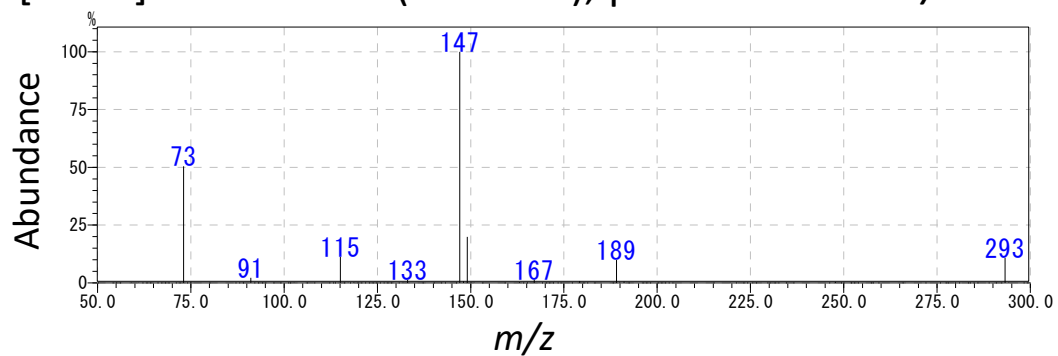

Natural fumaric acid (2TBDMS), precursor ion:  $m/z = 287$

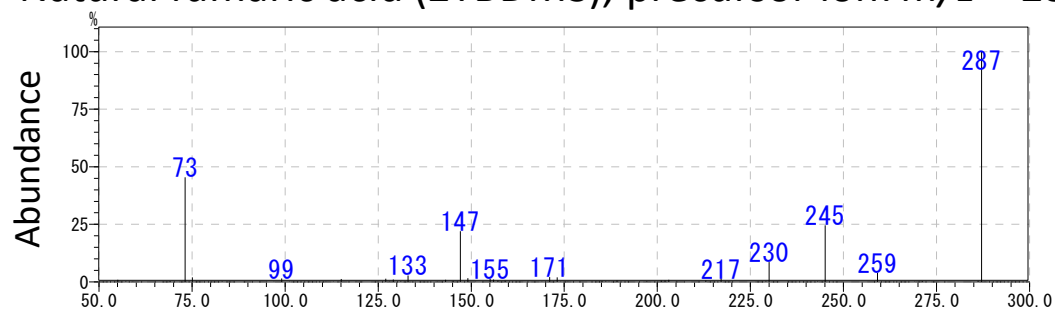

[U- $^{13}\text{C}$ ]fumaric acid (2TBDMS), precursor ion:  $m/z = 291$

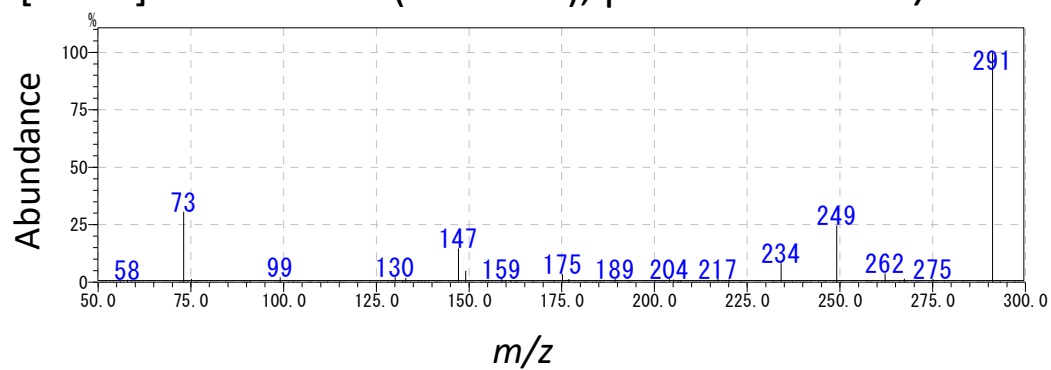

Natural malic acid (3TBDMS), precursor ion:  $m/z = 419$

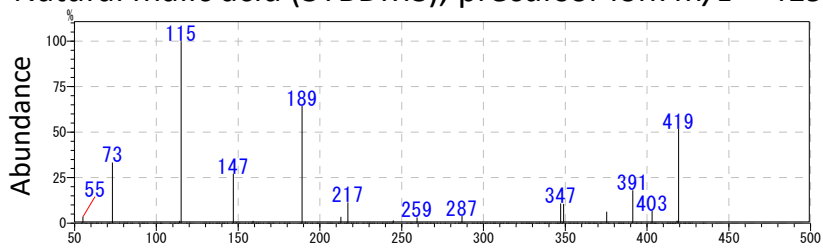

[1- $^{13}\text{C}$ ]malic acid (3TBDMS), precursor ion:  $m/z = 420$

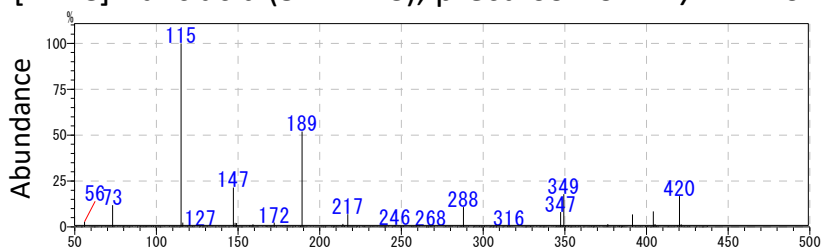

[2- $^{13}\text{C}$ ]malic acid (3TBDMS), precursor ion:  $m/z = 420$

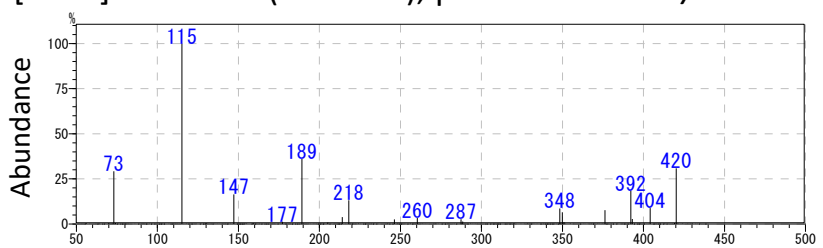

[3- $^{13}\text{C}$ ]malic acid (3TBDMS), precursor ion:  $m/z = 420$

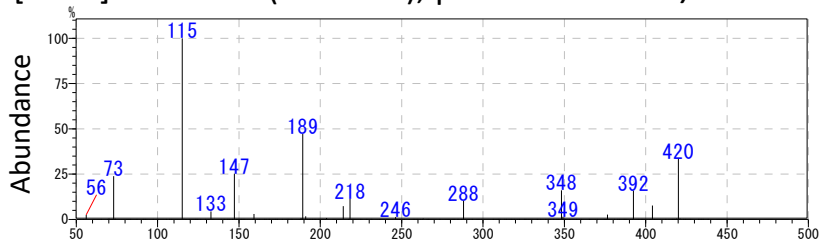

[4- $^{13}\text{C}$ ]malic acid (3TBDMS), precursor ion:  $m/z = 420$

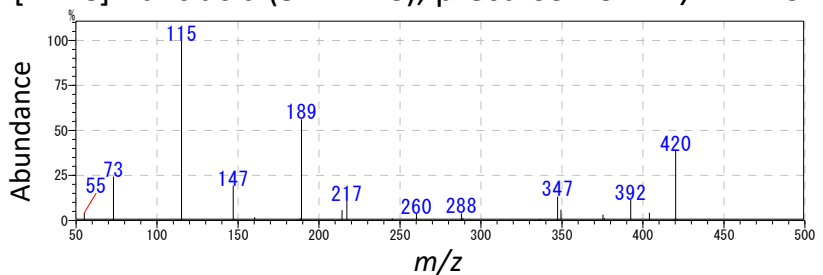

[U- $^{13}\text{C}$ ]malic acid (3TBDMS), precursor ion:  $m/z = 423$

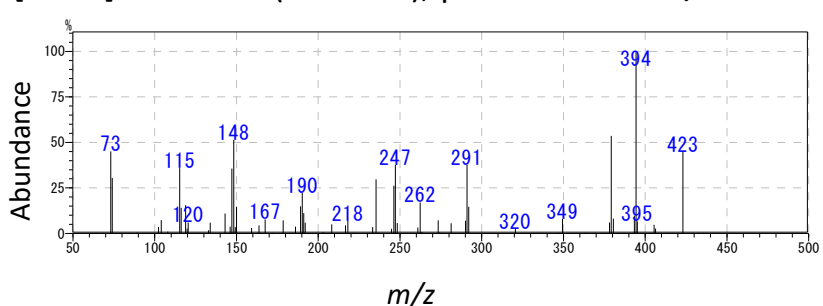

Natural malic acid (3TBDMS), precursor ion:  $m/z = 317$

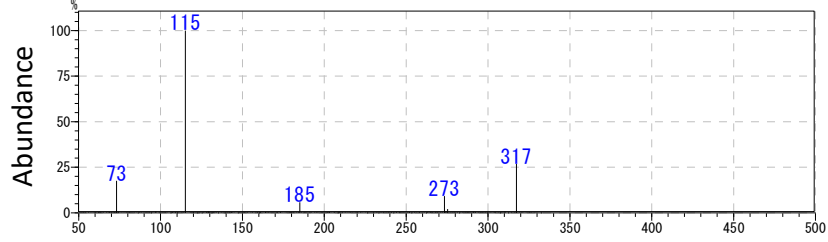

[1-<sup>13</sup>C]malic acid (3TBDMS), precursor ion:  $m/z = 317$

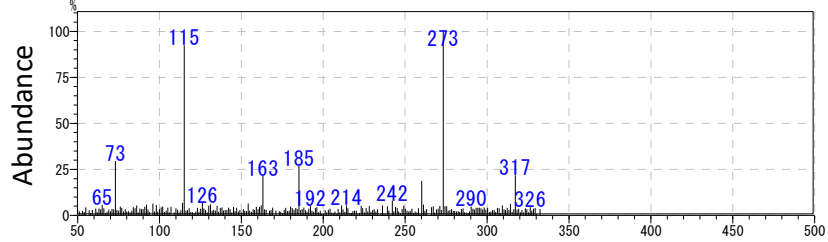

[2-<sup>13</sup>C]malic acid (3TBDMS), precursor ion:  $m/z = 318$

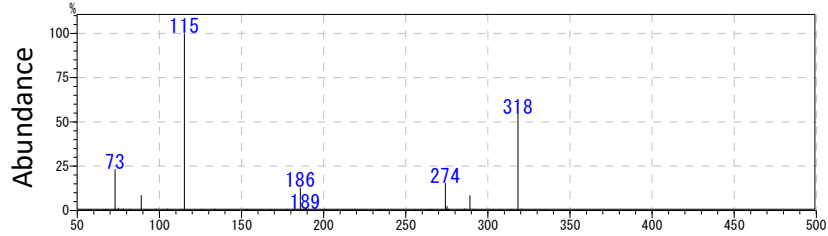

[3-<sup>13</sup>C]malic acid (3TBDMS), precursor ion:  $m/z = 318$

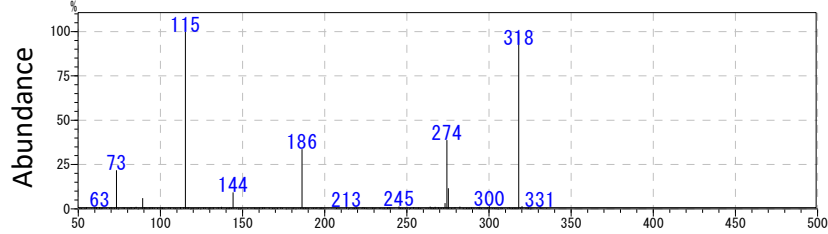

[4-<sup>13</sup>C]malic acid (3TBDMS), precursor ion:  $m/z = 318$

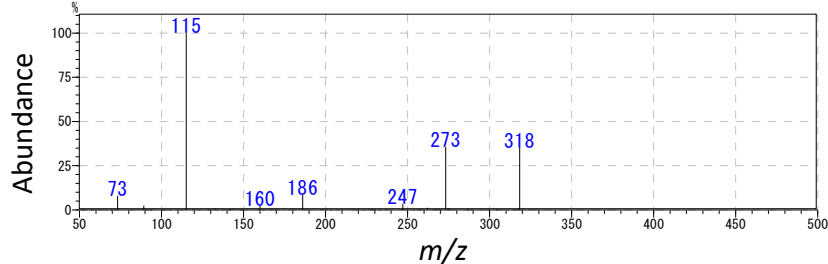

[U-<sup>13</sup>C]malic acid (3TBDMS), precursor ion:  $m/z = 320$

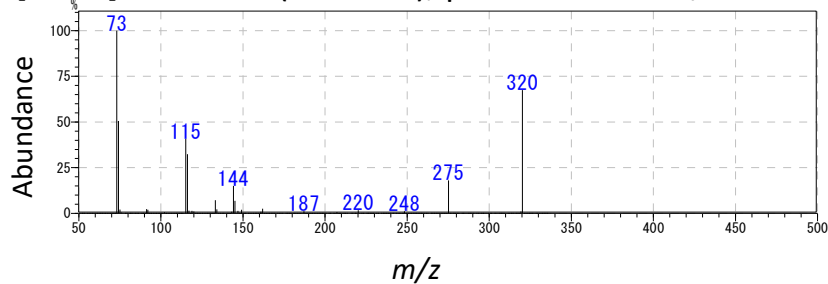

Supplement: massspectrometry-8-1-A0073-s001.pdf [file massspectrometry-8-1-A0073-s001.pdf]
